# Supplementary material
Source: ML conference proceedings conference paper supplement (https://www.ecva.net/papers/eccv_2022/papers_ECCV/html/136620468_ECCV_2022_paper.php)
Supplement: Supplementary file 1 [file 136620468-supp.pdf]

301 Moved Permanently

# Moved Permanently

The document has moved here.

---

Apache/2.4.62 (Debian) Server at www.ecva.net Port 80
